# Supplementary material
Source: publisher site journal article supplement (https://www.spandidos-publications.com/8169/downloadSupplementary)
Supplement: Supplementary file 1 [file downloadSupplementary]

## Sheet: Sheet1
Table SI. Sequences of the primers.
Gene name	Primer Forward	Primer Reverse
Mouse HAS2	GAAGTCCCTTGAAACCCCGAT	TCCATCATGTAAAGGTCGTCGT
Mouse GAPDH	CCTCGTCCCGTAGACAAAATG	TGAGGTCAATGAAGGGGTCGT
Mouse ACTA2	TCAGGGAGTAATGGTTGGAATG	GGTGATGATGCCGTGTTCTA
Mouse COL1A1	AGACCTGTGTGTTCCCTACT	GAATCCATCGGTCATGCTCTC
